# Supplementary material for: Ni/Co phosphide nanoparticles embedded in N/P-doped carbon nanofibers towards enhanced hydrogen evolution
Source: Royal Society of Chemistry journal article supplement (doi:10.1039/d0ce01621g), 2020-11-23
Supplement: d0ce01621g1.pdf [file d0ce01621g1.pdf]

## Supplementary Information

### **Ni/Co phosphide nanoparticles embedded in N/P-doped carbon nanofibers towards enhanced hydrogen evolution**

Changle Wang,<sup>a, b</sup> Lipeng Zhang,<sup>\*a</sup> Ping Yang<sup>\*b</sup>

<sup>a</sup> School of Chemistry and Chemical Engineering, Shandong University of Technology, Zibo, 255049, P.R. China, email: zhanglipeng@sdut.edu.cn

<sup>b</sup> School of Material Science and Engineering, University of Jinan, Jinan, 250022, P.R. China, e-mail: yangp@ujn.edu.cn

<sup>c</sup> College of Materials Science and Engineering, Qingdao University of Science and Technology, Qingdao, 266042, PR China

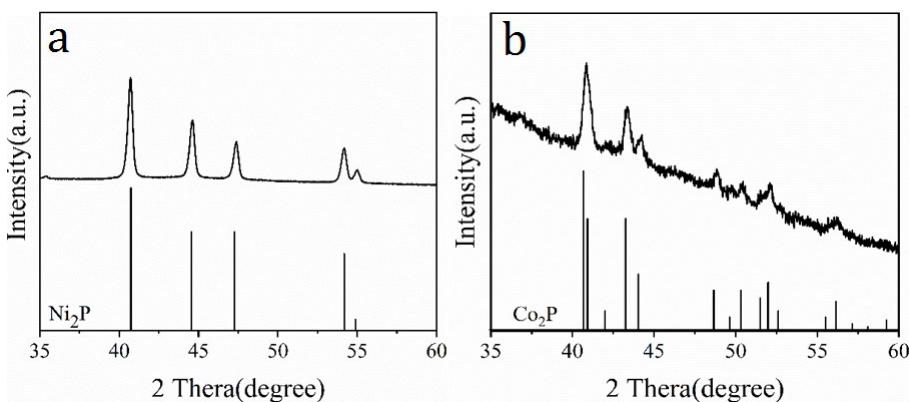

**Fig. S1.** XRD patterns of samples. (a), Ni<sub>2</sub>P/NPNFs. (b), Co<sub>2</sub>P/NPCNFs.

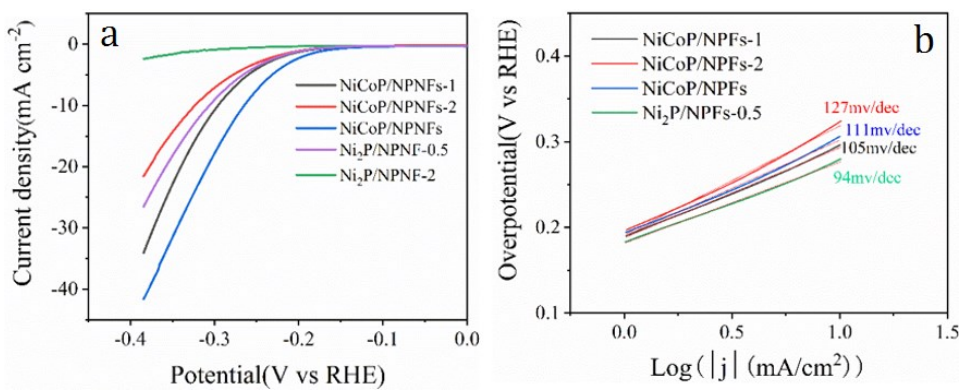

**Fig. S2.** (a) HER polarization curves of Ni<sub>2</sub>P/NPFs-0.5, Ni<sub>2</sub>P/NPFs-2, NiCoP/NPFs-1, NiCoP/NPFs-2, (b) Tafel plot derived from the HER polarization curves.

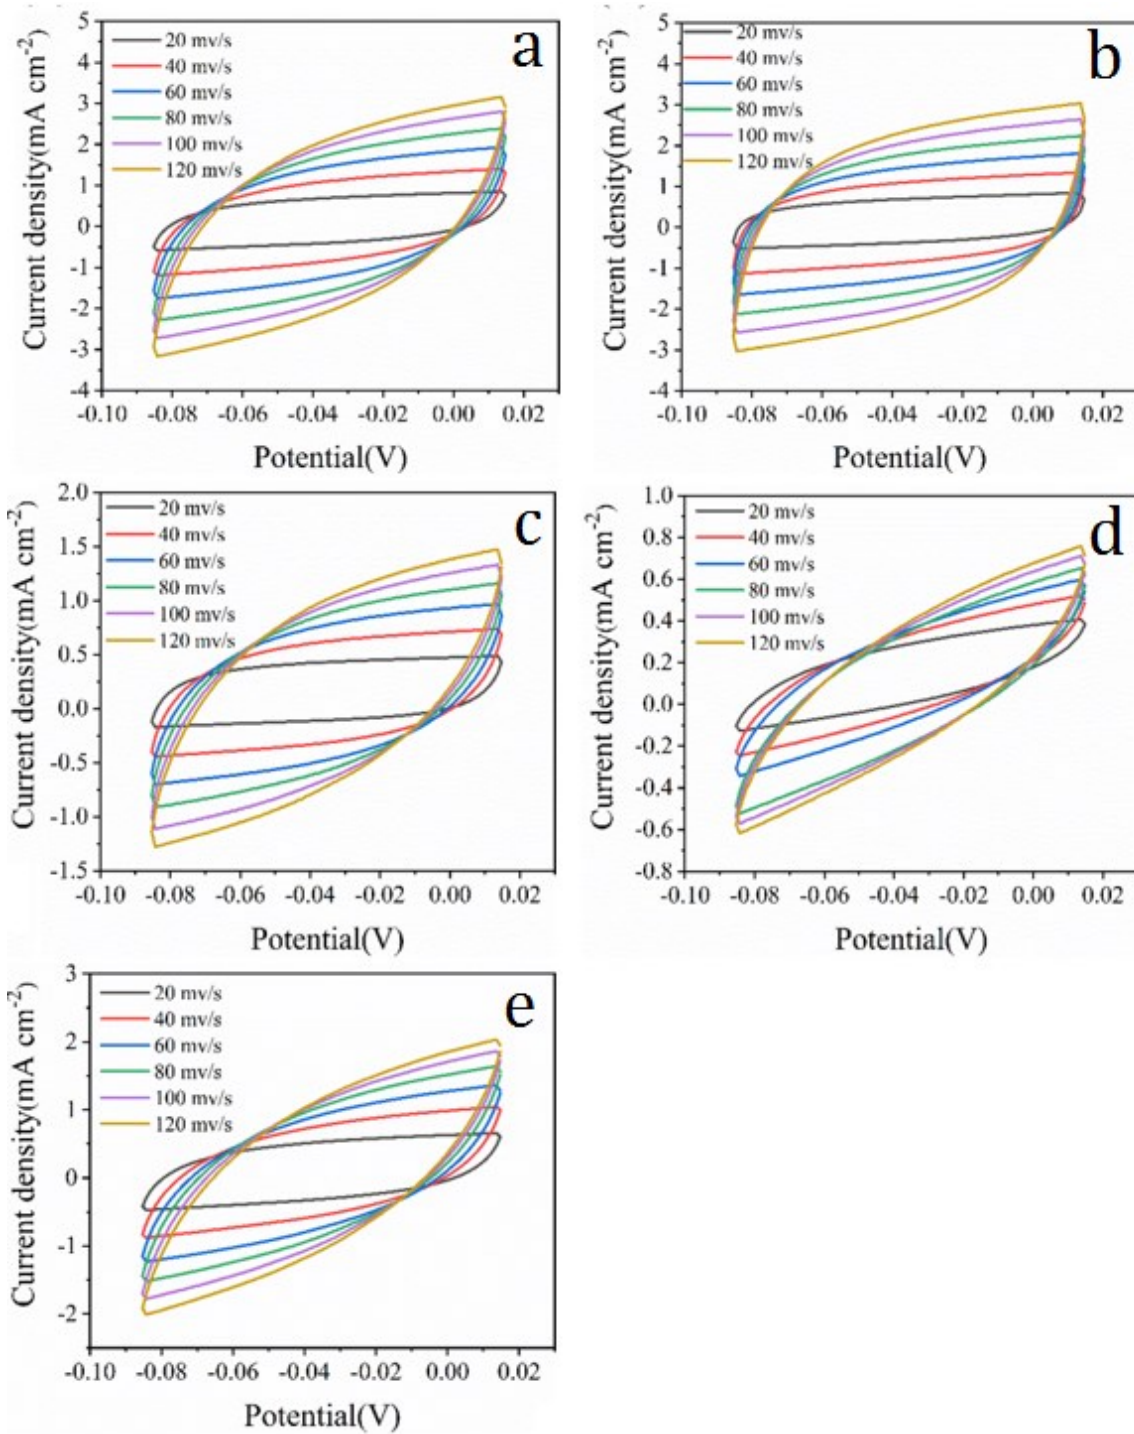

**Fig. S3.** Cyclic voltammograms plots of samples as electrodes with different scan rates. (a), Ni<sub>2</sub>P/NPNFs. (b), Co<sub>2</sub>P/NPNFs. (c), NiCoP/NPNFs. (d), NiCoP/NPNFs-1. (e), NiCoP/NPNFs-2.

In 0.5mol/L H<sub>2</sub>SO<sub>4</sub>, CV tests were conducted on different materials at scanning rates of 20, 40, 60, 80, 100 and 120mv/s, respectively. The test range was set at the stage where Faraday current was not generated. The corresponding electrochemical area was calculated according to the equation (1):

$$A \frac{\text{Sample}}{\text{ECSA}} = \frac{\text{specific capacitance}}{60\mu\text{F}/\text{cm}^2} \quad (1)$$

*A*

$$\text{ECSA (Ni}_2\text{P/NPNFs)} = 299.5\text{cm}^2$$

$$\text{ECSA (Co}_2\text{P/NPNFs)} = 123.5\text{cm}^2$$

$$\text{ECSA (NiCoP/NPNFs)} = 311.67\text{cm}^2$$

$$\text{ECSA (NiCoP/NPNFs-1)} = 151.83\text{cm}^2$$

$$\text{ECSA (NiCoP/NPNFs-2)} = 163.5\text{cm}^2$$
